# Supplementary material for: Colorimetric detection of melamine based on the size effect of AuNPs
Source: Royal Society of Chemistry journal article supplement (doi:10.1039/c4ay02622e), 2015-01-01
Supplement: c4ay02622e1.pdf [file c4ay02622e1.pdf]

1 **Colorimetric detection of Melamine based on the size effect of AuNPs**

2 **Ida Evangeline Paul<sup>a</sup>, A. Rajeshwari<sup>a</sup>, Prathna T.C.<sup>b</sup>, Ashok M. Raichur<sup>b,c</sup>, N.**

3 **Chandrasekaran<sup>a</sup>, Amitava Mukherjee<sup>a\*</sup>**

4

5 <sup>a</sup> Centre for Nanobiotechnology, VIT University, Vellore-632014, India.

6 <sup>b</sup> Department of Materials Engineering, Indian Institute of Science, Bangalore-560012,  
7 India.

8 <sup>c</sup> Department of Applied Chemistry, University of Johannesburg, Johannesburg, South Africa

9 Centre for Nanobiotechnology, VIT University, Vellore, India

10 Supplementary information

11

12 **\*Corresponding author**

13 **Dr. Amitava Mukherjee**

14 **Senior Professor & Deputy Director**

15 **Centre for Nanobiotechnology**

16 **VIT University, Vellore - 632014**

17 **Email: [amit.mookerjea@gmail.com](mailto:amit.mookerjea@gmail.com)**

18 **Phone: 91 416 2202620**

19 **Fax: 91-416-2243092**

20

21 **RESULTS**

22 **Table S1.** The effect of AuNPs pH for a wide range of melamine concentration ( $10^{-4}$  M-  $10^{-6}$   
 23 M) for colorimetric sensing.

| AuNP     | pH | Melamine Concentration |             |             |
|----------|----|------------------------|-------------|-------------|
|          |    | $10^{-4}$ M            | $10^{-5}$ M | $10^{-6}$ M |
| AuNP-I   | 3  | *                      | *           | *           |
|          | 4  | 0.894                  | 0.925       | 0.922       |
|          | 5  | 0.548                  | 0.795       | *           |
|          | 7  | *                      | *           | *           |
| AuNP-II  | 3  | *                      | *           | *           |
|          | 5  | 1.277                  | 1.159       | 0.840       |
|          | 7  | 1.00                   | 0.340       | *           |
| AuNP-III | 3  | *                      | *           | *           |
|          | 4  | 0.690                  | 0.593       | 0.334       |
|          | 5  | *                      | *           | *           |
|          | 7  | *                      | *           | *           |

24

25 \*No Interaction

26

27 **Table S2.** The effect of AuNPs/Melamine volumetric ratio for a wide range of melamine  
 28 concentration ( $10^{-4}$  M-  $10^{-6}$  M) for colorimetric sensing.

| AuNP     | Volume of AuNP $\mu$ l | Volume of melamine $\mu$ l | AuNP/melamine Volumetric ratio | Concentration of melamine |             |             | $R^2$  |
|----------|------------------------|----------------------------|--------------------------------|---------------------------|-------------|-------------|--------|
|          |                        |                            |                                | $10^{-4}$ M               | $10^{-5}$ M | $10^{-6}$ M |        |
| AuNP-I   | 400                    | 600                        | 2:3                            | 1                         | 1.011       | 0.998       | 0.964  |
|          | 500                    | 500                        | 1:1                            | 0.894                     | 0.925       | 0.922       | 0.567  |
|          | 600                    | 400                        | 3:2                            | 0.943                     | 0.931       | 0.948       | 0.8173 |
| AuNP-II  | 400                    | 600                        | 2:3                            | 1.328                     | 1.182       | 1.109       | 0.976  |
|          | 500                    | 500                        | 1:1                            | 1.259                     | 1.232       | 1.163       | 0.817  |
|          | 600                    | 400                        | 3:2                            | 1.243                     | 1.197       | 0.991       | 0.991  |
| AuNP-III | 400                    | 600                        | 2:3                            | 0.483                     | 0.322       | 0.212       | 0.988  |
|          | 500                    | 500                        | 1:1                            | 0.690                     | 0.593       | 0.334       | 0.935  |
|          | 600                    | 400                        | 3:2                            | 0.770                     | 0.681       | 0.198       | 0.864  |

29

30 **Fig. S1.** The scanning electron microscopic images of bare (a) AuNP-I, (b) AuNP-II and (c)  
 31 AuNP-III

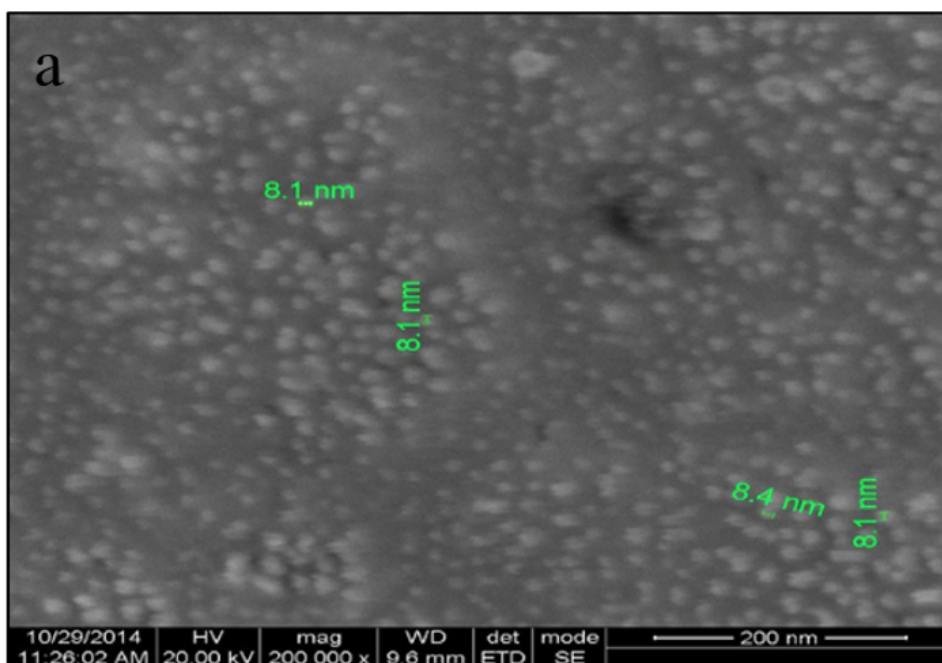

32

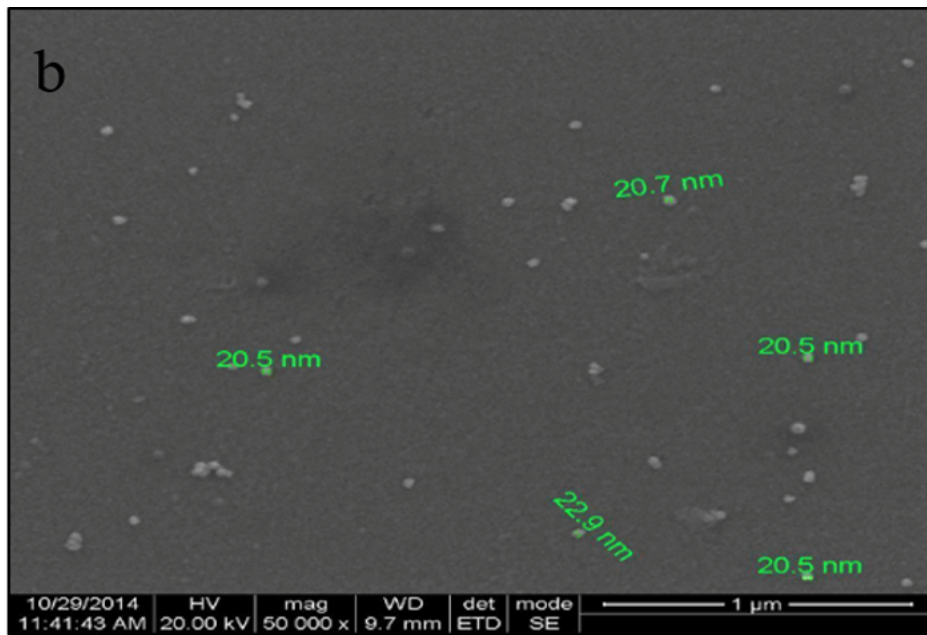

33

34

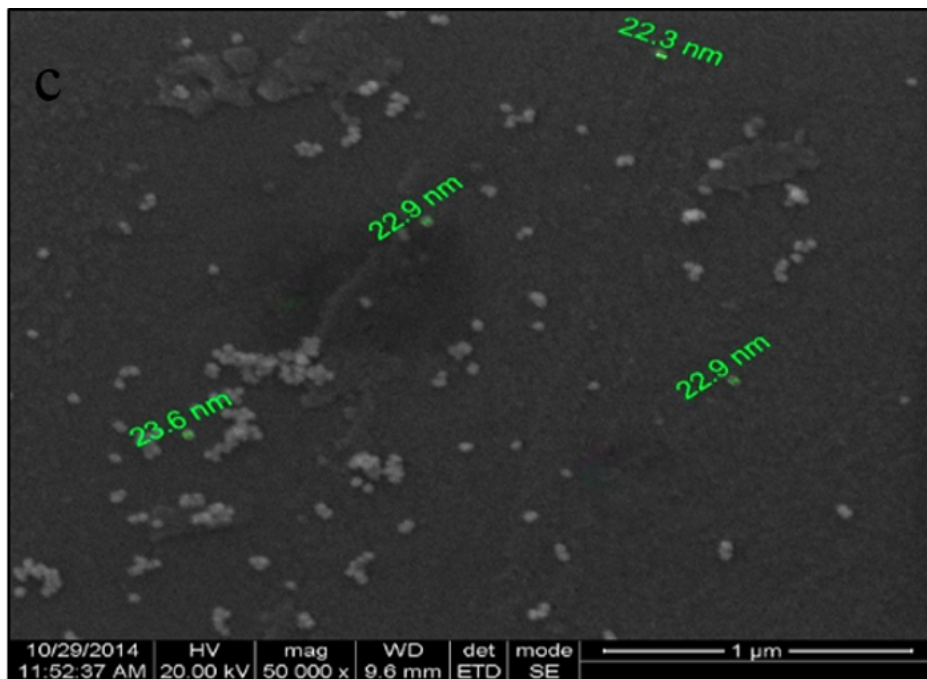

35

36

37

38

39

40 **Fig. S2.** The UV-visible spectra of (a) AuNP-I, (b) AuNP-II and (c) AuNP-III with different  
41 melamine concentration ( $10^{-4}$  M- $10^{-6}$  M)

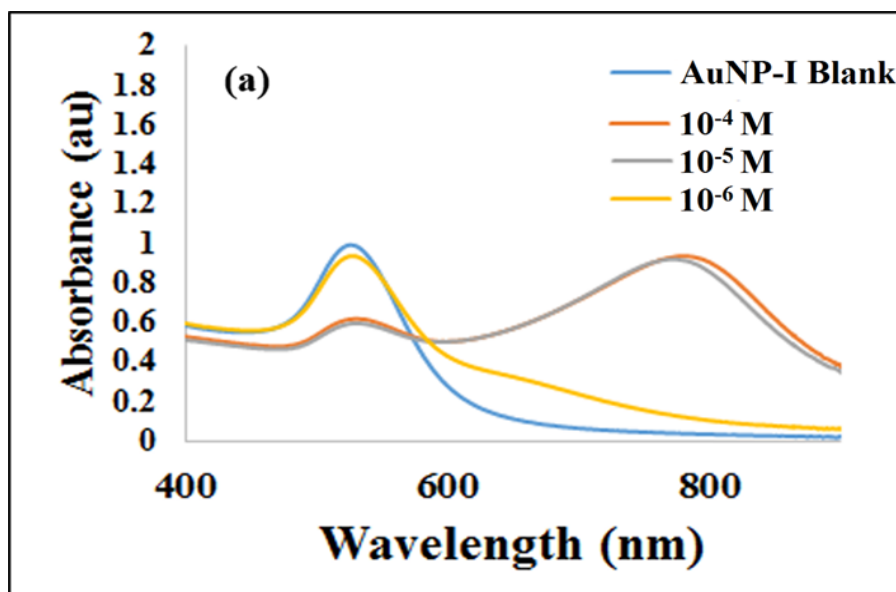

42

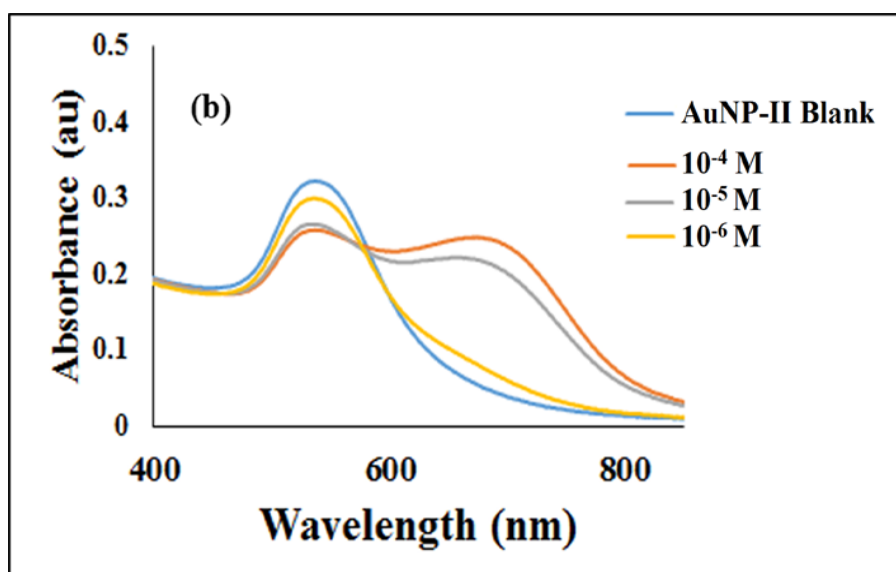

43

44

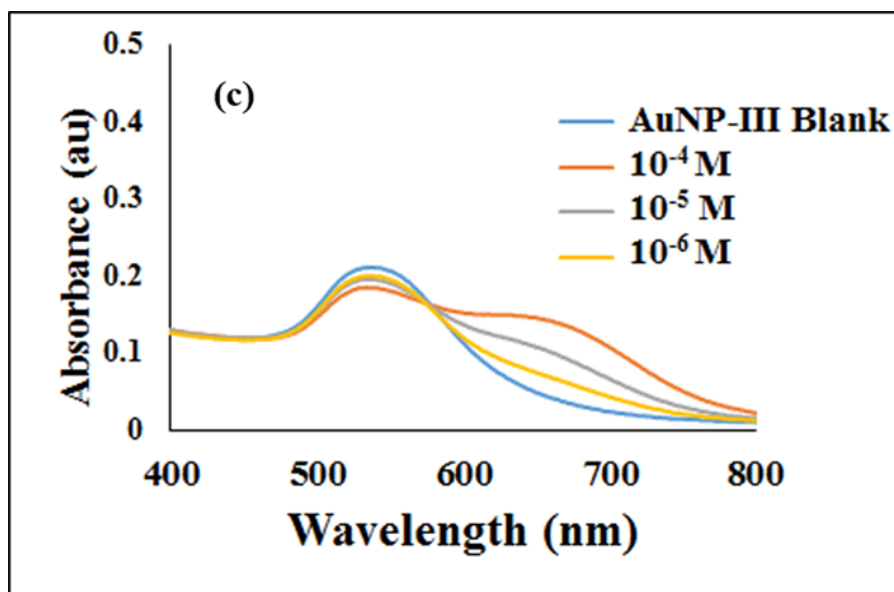

45

46

47 **Fig. S3.** Calibration curve of aqueous solution (Orange line  $y = 0.526x + 0.1619$ ) comparison

48 with milk powder (Blue line  $y =$ ), liquid milk (Green line  $y = 0.4917x + 0.2171$ ) and Raw milk

49 (Purple line  $y = 0.4923x + 0.2297$ )

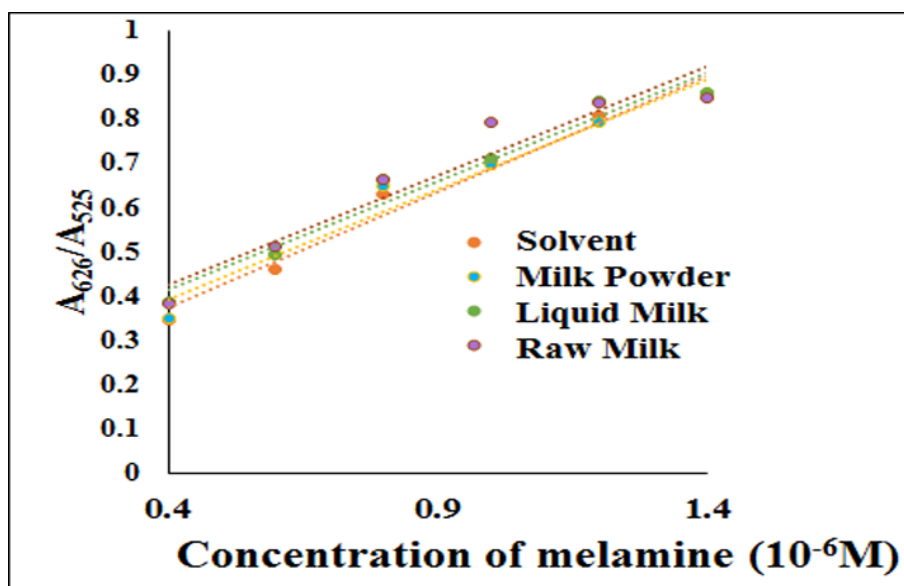

50
